# Supplementary material
Source: PubMed Central journal article supplement (PMC9350378)

A

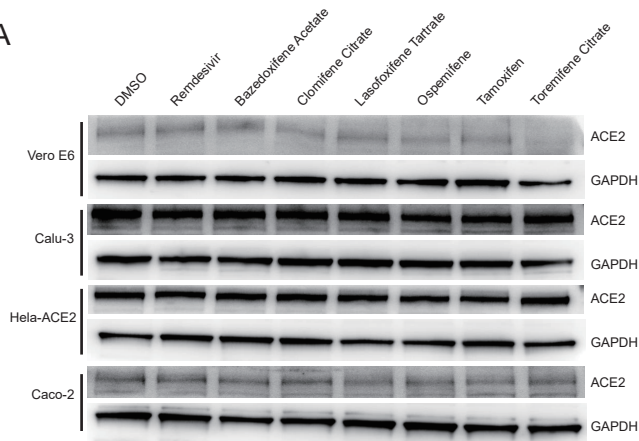

B

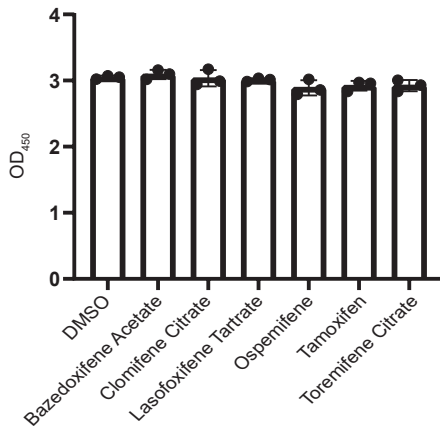

C

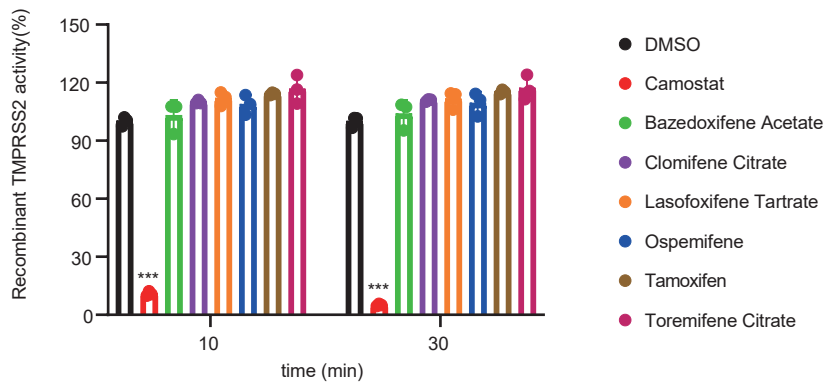

Supplement: JMV-94-4809-s002.pdf [file JMV-94-4809-s002.pdf]

A

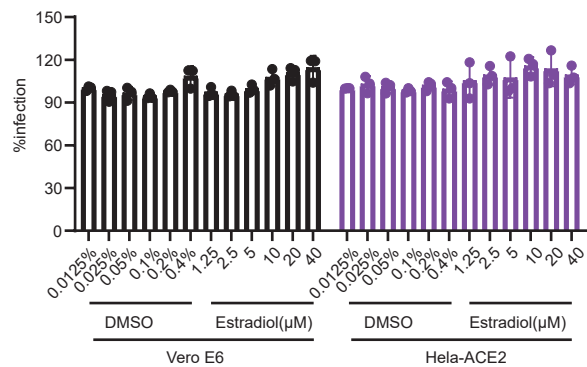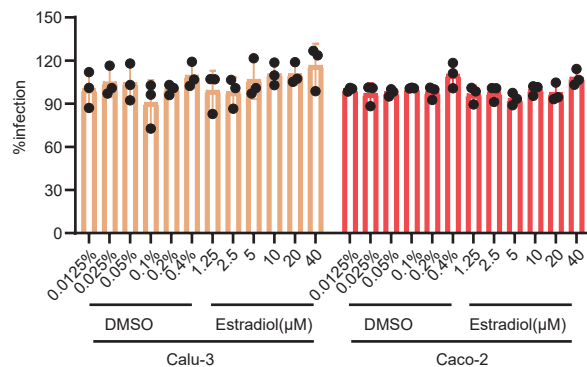

B

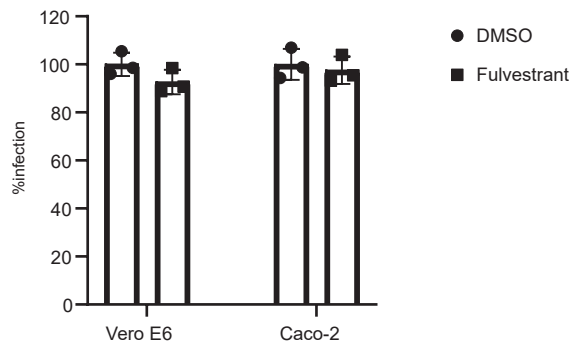

C

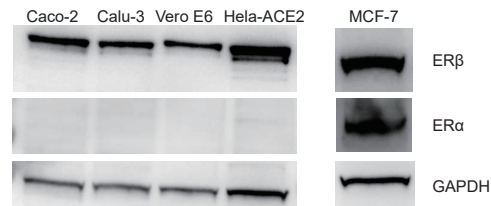

D

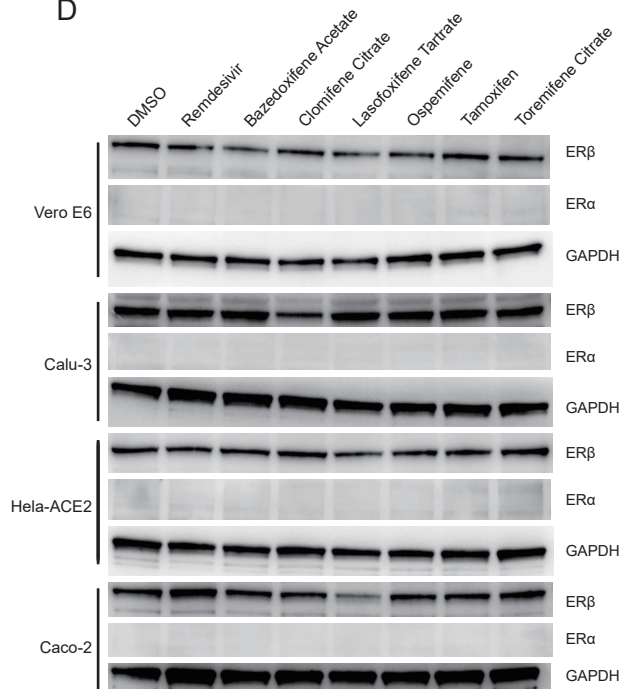

Supplement: JMV-94-4809-s004.pdf [file JMV-94-4809-s004.pdf]
